# Supplementary material for: Marine Fungus Aspergillus chevalieri TM2-S6 Extract Protects Skin Fibroblasts from Oxidative Stress
Source: PubMed Central journal article supplement (PMC7551392; doi:10.3390/md18090460), 2020-09-08
Supplement: marinedrugs-18-00460-s001.pdf [file marinedrugs-18-00460-s001.pdf]

# Marine fungus *Aspergillus chevalieri* TM2-S6 Extract protects skin fibroblasts from oxidative stress

Sophia Letsiou<sup>1\*</sup>, Artemis Bakea<sup>1</sup>, Géraldine Le Goff<sup>2</sup>, Philippe Lopes<sup>2</sup>, Michal Weis<sup>3</sup>, Yehuda Banayahu<sup>3</sup>, Jamal Ouazzani<sup>2</sup>.

1. Laboratory of Biochemistry, Research and Development department, APIVITA S.A., Industrial Park of Markopoulo Mesogaias, 19003 Markopoulo Attiki, Athens, Greece.

2. Institut de Chimie des Substances Naturelles ICSN, Centre National de la Recherche Scientifique CNRS, Avenue de la Terrasse 91198, Gif-sur-Yvette, France.

3. School of Zoology, George S. Wise Faculty of Life Sciences, Tel Aviv University, Ramat Aviv, Tel Aviv 69978, Israel.

## Supplementary Material

| Species                  | Section            | Genbank (Samson et al. 2014)   | strain     |
|--------------------------|--------------------|--------------------------------|------------|
| <i>A. pseudoglaucus</i>  | <i>Aspergillus</i> | EF652050                       | NRRL 40    |
| <i>A. neocarnoyi</i>     | <i>Aspergillus</i> | EF652057                       | NRRL 126   |
| <i>A. cibarius</i>       | <i>Aspergillus</i> | JQ918177                       | KACC 46346 |
| <i>A. brunneus</i>       | <i>Aspergillus</i> | EF652060                       | NRRL 131   |
| <i>A. glaucus</i>        | <i>Aspergillus</i> | EF652052                       | NRRL 116   |
| <i>A. tonophilus</i>     | <i>Aspergillus</i> | EF652081                       | NRRL 5124  |
| <i>A. niveoglaucus</i>   | <i>Aspergillus</i> | EF652058                       | NRRL 127   |
| <i>A. proliferans</i>    | <i>Aspergillus</i> | EF652064                       | NRRL 1908  |
| <i>A. appendiculatus</i> | <i>Aspergillus</i> | HE615132                       | CBS 374.75 |
| <i>A. ruber</i>          | <i>Aspergillus</i> | EF652066                       | NRRL 52    |
| <i>A. montevidensis</i>  | <i>Aspergillus</i> | EF652077                       | NRRL 108   |
| <i>A. cristatus</i>      | <i>Aspergillus</i> | EF652078                       | NRRL 4222  |
| <i>A. chevalieri</i>     | <i>Aspergillus</i> | EF652068                       | NRRL 78    |
| <i>A. costiformis</i>    | <i>Aspergillus</i> | HE615136                       | CBS 101749 |
| <i>A. intermedius</i>    | <i>Aspergillus</i> | EF652074                       | NRRL 82    |
| <i>A. xerophilus</i>     | <i>Aspergillus</i> | EF652085                       | NRRL 6131  |
| <i>A. osmophilus</i>     | <i>Aspergillus</i> | KC473921                       | IRAN 2090C |
| <i>A. leucocarpus</i>    | <i>Aspergillus</i> | EF652087                       | NRRL 3497  |
| <i>A. restrictus</i>     | <i>Restricti</i>   | EF652042                       | NRRL 154   |
| <i>A. caesiellus</i>     | <i>Restricti</i>   | EF652044                       | NRRL 5061  |
| <i>A. vitricola</i>      | <i>Restricti</i>   | EF652046                       | NRRL 5125  |
| <i>A. chevalieri</i>     | <i>Restricti</i>   | MT256106 (Genbank, this paper) | TM2-S6     |

Table S1. *Aspergillus* species of the section *Aspergillus restricti* with Genbank numbers

Analytical HPLC system consisted of an Alliance Waters 2695 controller coupled with a PhotoDiode Array Waters 2996, an evaporative light-scattering detector ELSD Waters 2424 detector and a mass detector Waters QDa (Waters SAS, Saint-Quentin-en-Yvelines, France). Sunfire C<sub>18</sub> column (4.6 × 150 mm, 3.5 μm) was used with a flow rate of 0.7 mL/min. The elution gradient consisted of a linear gradient from 100 % solvent A to 100% solvent B in 40 min, then 10 min at 100% B (Solvent A: H<sub>2</sub>O + 0,1 HCOOH, Solvent B: ACN + 0,1% HCOOH).

Preparative HPLC was performed on a semi-preparative Sunfire C<sub>18</sub> column (10 × 250 mm, 5 μm) using a Waters autosampler 717, a pump 600, a photodiode array detector 2996 and an ELSD detector 2420 (Waters SAS, Saint-Quentin-en-Yvelines, France). ACCB medium of *Aspergillus chevalieri* TM2-S6 was extracted with ethyl acetate leading to the mixture of two main compounds reported in the results section.

NMR experiments were performed using a Bruker Avance III 600 MHz spectrometer equipped with a TCi cryo-probe head for compounds **8**, **9** and **10**, and a Bruker Avance 500 MHz spectrometer for compounds **1 to 7** (Bruker, Vienna, Austria). The spectra were acquired in CD<sub>3</sub>OD (δ<sub>H</sub> 3.31 ppm and δ<sub>C</sub> 49.15 ppm), in CD<sub>2</sub>Cl<sub>2</sub> (δ<sub>H</sub> 5.32 ppm and δ<sub>C</sub> 53.10 ppm) or in Acetone-*d*<sub>6</sub> (δ<sub>H</sub> 2.04 ppm and δ<sub>C</sub> 29.8 ppm and 206.5 ppm) at 300K.

High-resolution mass spectra were obtained on a Waters LCT Premier XE spectrometer equipped with an ESI-TOF (electrospray-time of flight) by direct infusion of the purified compounds (Waters SAS, Saint-Quentin-en-Yvelines, France).

**Table S2.** Materials and methods used for analytical and structural characterization

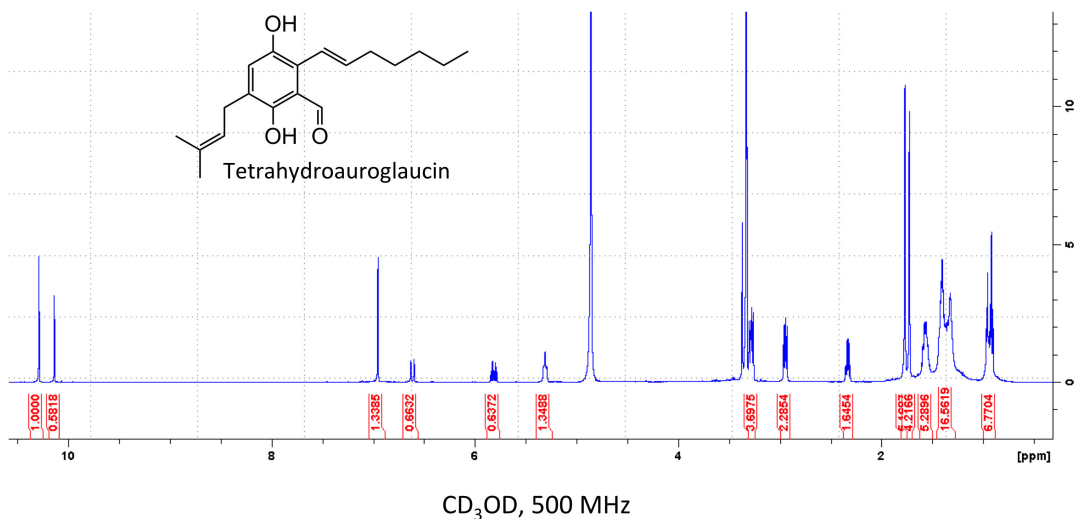

### Elemental Composition Report

#### Single Mass Analysis

Tolerance = 10.0 PPM / DBE: min = -1.5, max = 100.0

Element prediction: Off

Number of isotope peaks used for i-FIT = 9

Monoisotopic Mass, Even Electron Ions

467 formula(e) evaluated with 3 results within limits (all results (up to 1000) for each mass)

Elements Used:

C: 0-50 H: 0-100 N: 0-10 O: 0-20

29-Aug-2019 11:35:27

2: TOF MS ES<sup>+</sup>

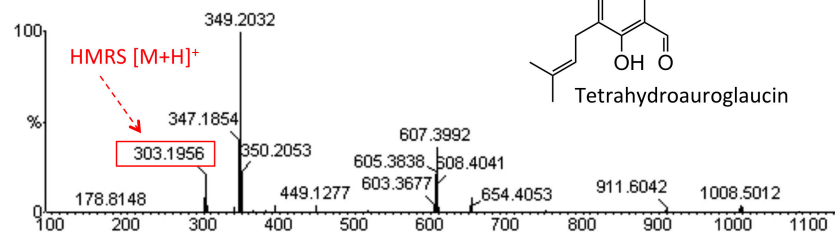

Minimum: -1.5  
Maximum: 5.0 10.0 100.0

| Mass     | Calc. Mass | mDa  | PPM  | DBE | i-FIT | i-FIT (Norm) | Formula       |
|----------|------------|------|------|-----|-------|--------------|---------------|
| 303.1946 | 303.1933   | 1.3  | 4.3  | 7.5 | 50.9  | 0.4          | C15 H23 N6 O  |
| 303.1960 | 303.1960   | -1.4 | -4.6 | 6.5 | 52.6  | 2.1          | C19 H27 O3    |
| 303.1920 | 303.1920   | 2.6  | 8.6  | 2.5 | 52.0  | 1.5          | C14 H27 N2 O5 |

Figure S1. <sup>1</sup>H NMR and HRMS Spectra of tetrahydroauroglaucin

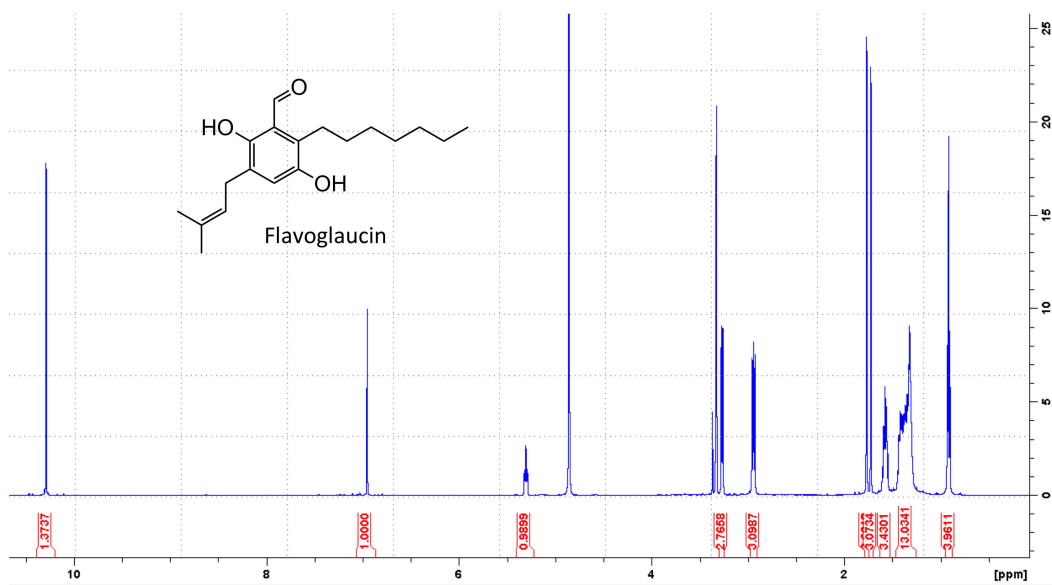

CD<sub>3</sub>OD, 500 MHz

### 1H NMR Spectra of 2

#### Elemental Composition Report

##### Single Mass Analysis

Tolerance = 10.0 PPM / DBE: min = -1.5, max = 100.0

Element prediction: Off

Number of isotope peaks used for i-FIT = 9

Monoisotopic Mass, Even Electron Ions

472 formula(e) evaluated with 3 results within limits (all results (up to 1000) for each mass)

Elements Used:

C: 0-50 H: 0-100 N: 0-10 O: 0-20

29-Aug-2019 11:38:26

1: TOF MS ES

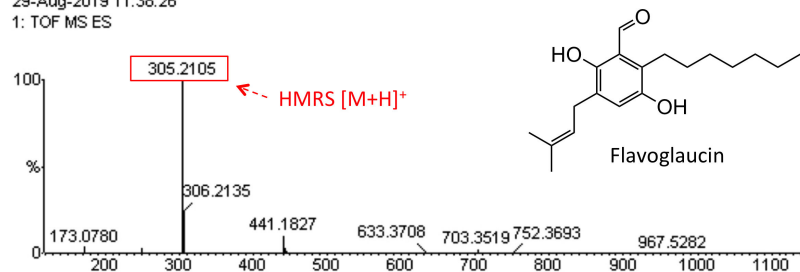

Minimum: -1.5  
Maximum: 5.0 10.0 100.0

| Mass     | Calc. Mass mDa | PPM  | DBE  | i-FIT | i-FIT (Norm) | Formula |                                                               |
|----------|----------------|------|------|-------|--------------|---------|---------------------------------------------------------------|
| 305.2105 | 305.2117       | -1.2 | -3.9 | 5.5   | 449.5        | 0.0     | C <sub>19</sub> H <sub>29</sub> O <sub>3</sub>                |
|          | 305.2090       | 1.5  | 4.9  | 6.5   | 456.0        | 6.6     | C <sub>15</sub> H <sub>25</sub> N <sub>6</sub> O              |
|          | 305.2076       | 2.9  | 9.5  | 1.5   | 457.7        | 8.2     | C <sub>14</sub> H <sub>29</sub> N <sub>2</sub> O <sub>5</sub> |

Figure S2. <sup>1</sup>H NMR and HRMS Spectra of flavoglaucin

| Gene   | Gene ID | Relative mRNA expression ration versus control |                                                 |                                                                     | P value |
|--------|---------|------------------------------------------------|-------------------------------------------------|---------------------------------------------------------------------|---------|
|        |         | NHDF treated with ACCB 0.05 µg/ml              | NHDF treated with H <sub>2</sub> O <sub>2</sub> | NHDF treated with H <sub>2</sub> O <sub>2</sub> and ACCB 0.05 µg/ml |         |
| CXCL8  | 3576    | 1.34                                           | 1.83                                            | 2.07                                                                | 0.03    |
| CD44   | 960     | 1.23                                           | 1.01                                            | 1.49                                                                | 0.04    |
| COL1A1 | 1277    | 3.13                                           | 0.89                                            | 4.60                                                                | 0.02    |
| COL3A1 | 1281    | 2.62                                           | 0.97                                            | 3.68                                                                | 0.02    |
| FOXO3  | 2309    | 2.17                                           | 0.92                                            | 1.58                                                                | 0.04    |
| GPX1   | 2876    | 1.16                                           | 1.49                                            | 1.54                                                                | 0.04    |
| MMP14  | 4323    | 2.26                                           | 0.84                                            | 6.08                                                                | 0.01    |
| NRF2   | 4780    | 1.59                                           | 0.74                                            | 1.54                                                                | 0.04    |
| SIRT1  | 23411   | 1.32                                           | 1.20                                            | 3.75                                                                | 0.02    |
| SIRT2  | 22933   | 1.43                                           | 0.97                                            | 3.53                                                                | 0.02    |
| SOD1   | 6646    | 1.10                                           | 1.66                                            | 2.16                                                                | 0.03    |
| VEGFA  | 7422    | 0.74                                           | 1.23                                            | 1.50                                                                | 0.04    |
| TGFB3  | 7043    | 1.24                                           | 1.23                                            | 1.88                                                                | 0.04    |

**Table S3.** Relative mRNA expression ration versus control into three different treatments

| Gene Symbol | Gene Name                                | Accession No   | KEGG pathway | Primmer F (5'-3')           | Primmer R (5'-3')          |
|-------------|------------------------------------------|----------------|--------------|-----------------------------|----------------------------|
| ACTB        | actin. beta                              | NM_001101.3    | hsa04810     | CTGTCCACCTTC<br>CAGCAGATGT  | AGCATTTGCGG<br>TGGACGAT    |
| GAPDH       | glyceraldehyde-3-phosphate dehydrogenase | NM_001256799.2 | hsa01200     | TTGCCCTCAACG<br>ACCACTTT    | CACCCTGTTGCT<br>GTAGCCAAA  |
| CD44        | CD44 molecule                            | NM_000610.3    | hsa04512     | CCAGAAGGAAC<br>AGTGGTTTGGC  | ACTGTCCTCTG<br>GGCTTGGTGTT |
| COL1A1      | collagen. type I. alpha 1                | NM_000088.3    | hsa04512     | CCTCAAGATGTG<br>CCTACTCTGA  | CTTTGATGGCAT<br>CCAGGTTG   |
| COL3A1      | collagen. type III alpha 1               | NM_001303110.1 | hsa04512     | GGAGTTTAGAAG<br>TGCGCCATTC  | CCAAAAGCTGT<br>AAGCGTTTGC  |
| FOXO3       | forkhead box O3                          | NM_001455.3    | hsa04068     | CAGGCACCATG<br>AATCTGAATGA  | GGAGCGTGATG<br>TTATCCAGCA  |
| TGFB3       | transforming growth factor beta 3        | NM_001329938.2 | hsa04068     | CTAAGCGGAATG<br>AGCAGAGGATC | TCTCAACAGCC<br>ACTCACGCACA |
| GPX1        | glutathione peroxidase 1                 | NM_000581.2    | hsa00480     | CGATGTTGCCTG<br>GAACTTTGAG  | ATGTCAATGGT<br>CTGGAAGCGG  |
| CXC8        | chemokine (C-X-C motif) ligand 8         | NM_000584.3    | hsa04064     | ACACTGCGCCAA<br>CACAGAAAT   | ACTTCTCCACA<br>ACCCTCTGCAC |
| MMP14       | matrix metalloproteinase 14              | NM_004994.2    | hsa04668     | ACGACGTCTTCC<br>AGTACCGAGA  | TAGGTCACGTA<br>GCCCACTTGGT |
| NRF2        | nuclear factor. erythroid 2-like 2       | NM_001145412.3 | hsa04141     | CCAAAGAGCAG<br>TTCAATGAAGC  | GCAGCCACTTT<br>ATTCTTACCCC |
| SIRT1       | sirtuin 1                                | NM_001142498.1 | hsa04068     | GGAGCAGATTA<br>GTAGGCGGCTT  | GCGCCATGGAA<br>AATGTAACG   |
| SIRT2       | sirtuin 2                                | NM_001193286.1 | hsa007608    | TGACGCCCAAGT<br>GTGAAGACT   | ATACAGGAGAA<br>GAAACGCGCTG |
| SOD1        | superoxide dismutase 1                   | NM_000454.4    | hsa04146     | GGATGAAGAGA<br>GGCATGTTGGA  | TAGACACATCG<br>GCCACACCAT  |
| VEGFA       | vascular endothelial growth factor A     | NM_001025366.2 | hsa04370     | CAGACGTGTA<br>TGTTCTGCA     | ACGTTCTTTA<br>ACTCAAGCTGC  |

**Table S4.** Characteristics and references of the investigated genes
